# Supplementary material for: Immunization Gender Inequity in Pakistan: An Analysis of 6.2 Million Children Born from 2019 to 2022 and Enrolled in the Sindh Electronic Immunization Registry
Source: MDPI journal article supplement (doi:10.3390/vaccines11030685), 2023-03-17
Supplement: s1 [file s1]

## Supplementary

Figure S1: Location of Urban, Rural, and Remote-Rural UCs in Sindh Province, Pakistan ( $n = 1130$ )

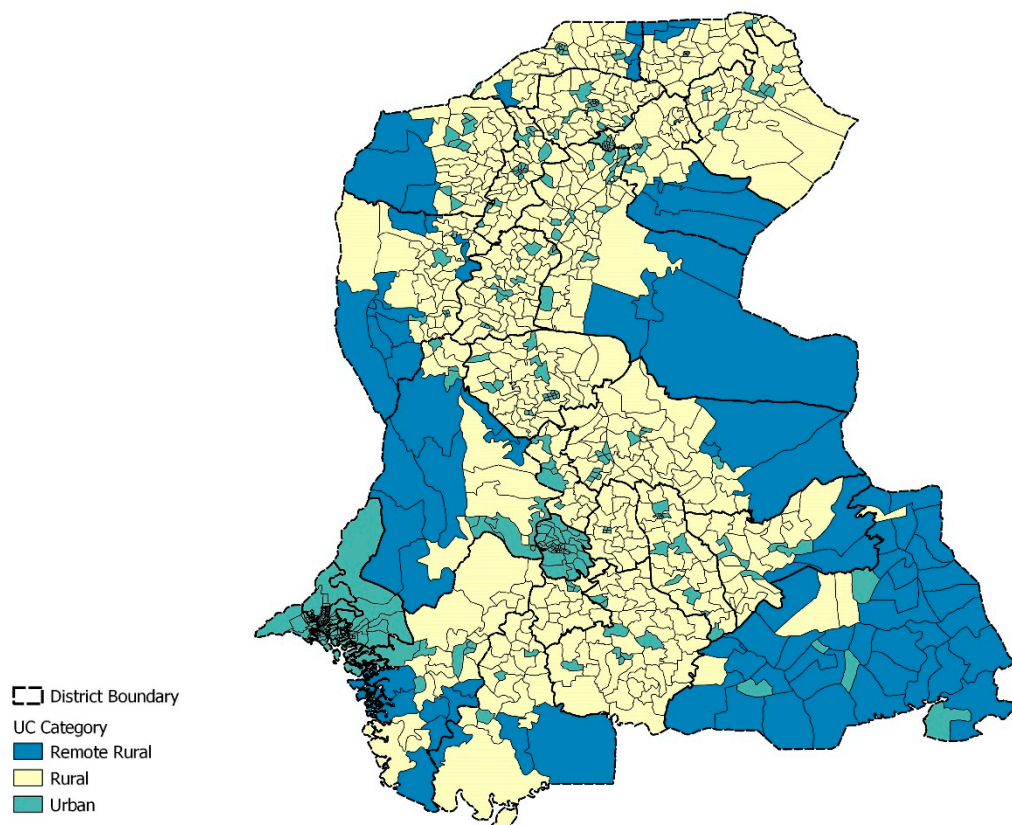

Figure S2: Annual male-to-female ratios among children (>6 weeks) who received Penta-1, Penta-3, and Measles-1 vaccinations in 2019–2022 birth cohorts enrolled in SEIR (1 January 2019–31 December 2022)

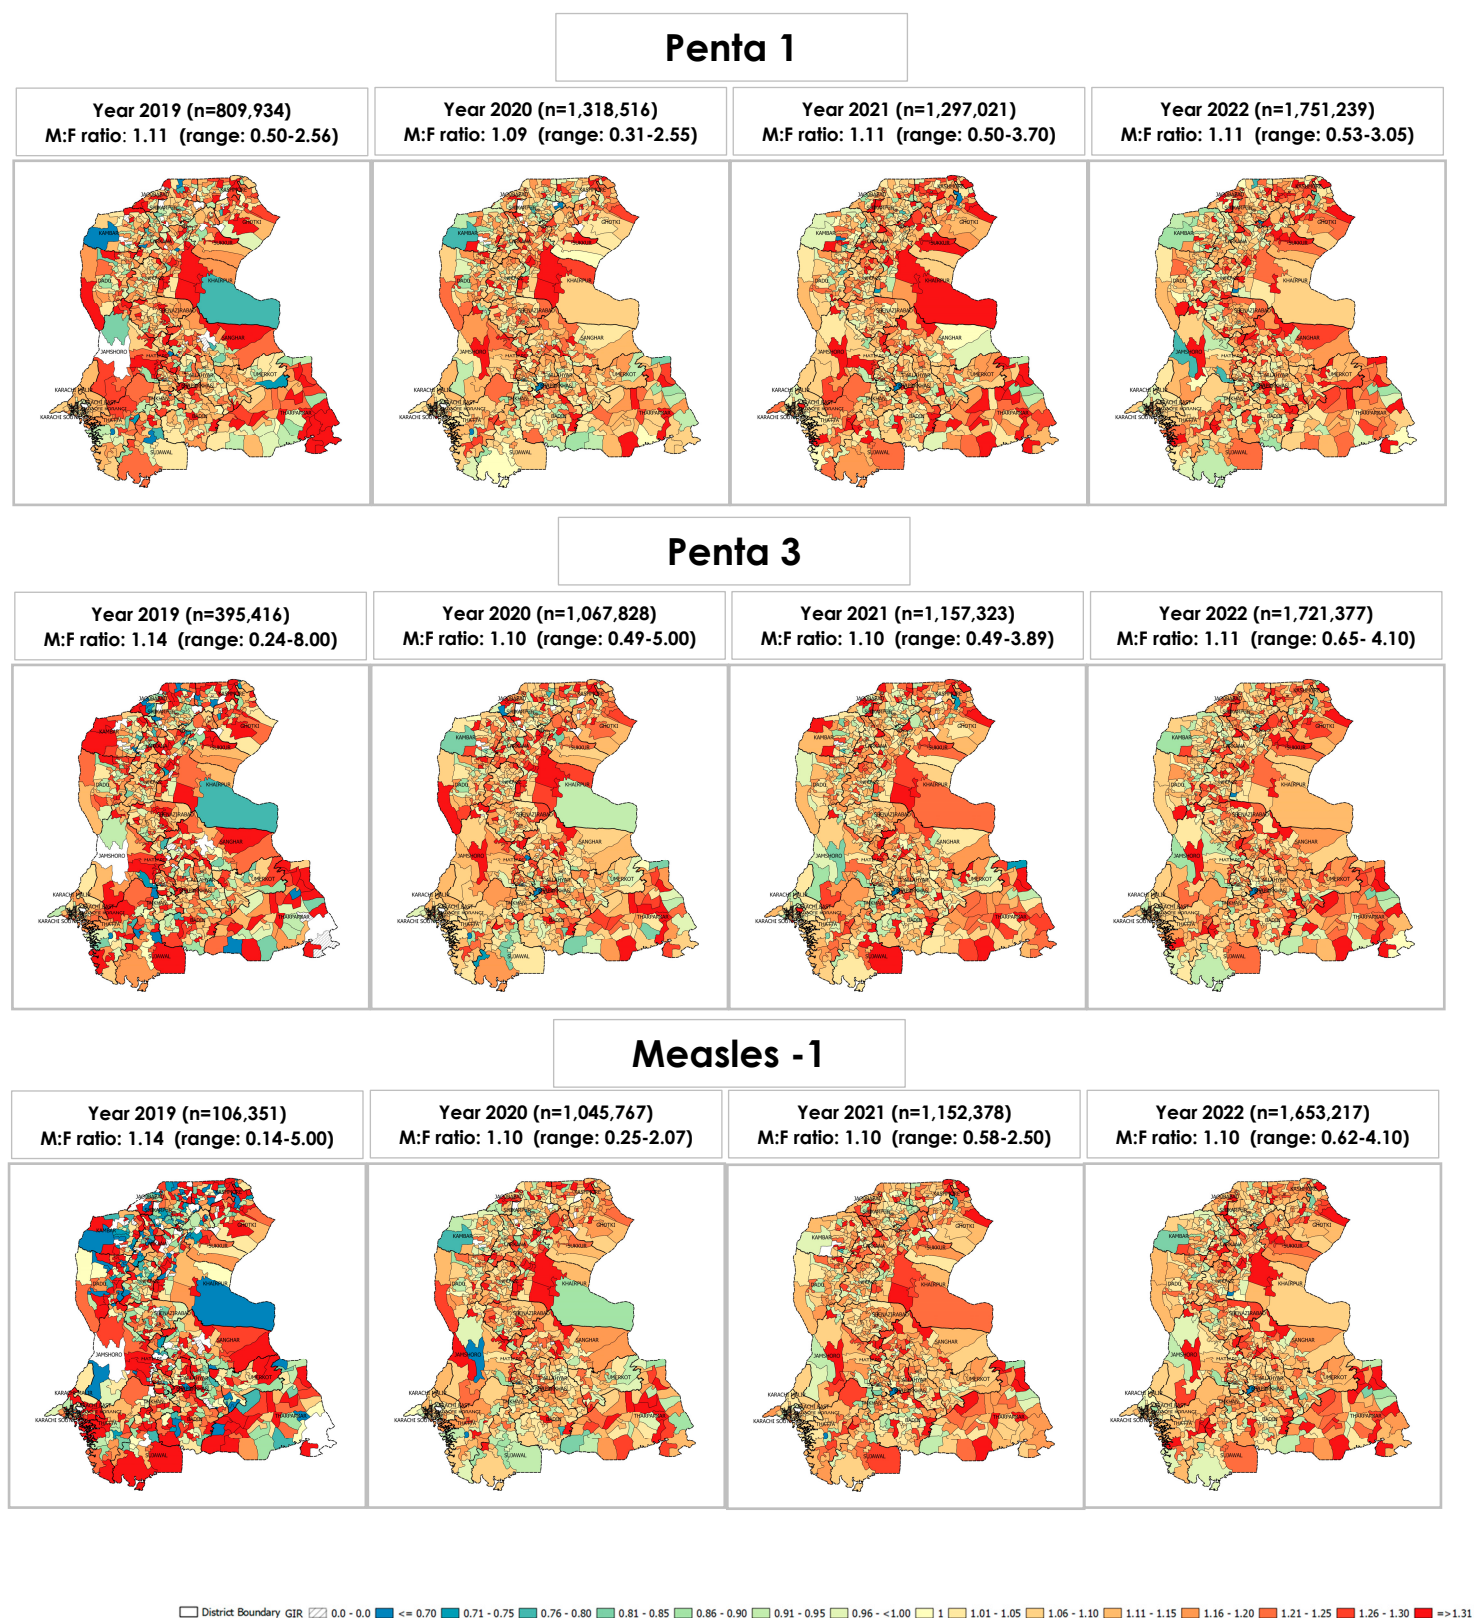

Figure S3: Annual gender inequality ratios (GIR) among children (>6 weeks) who received Penta-1, Penta-3, and Measles-1 vaccinations in 2019–2022 birth cohorts enrolled in SEIR (1 January 2019–31 December 2022)

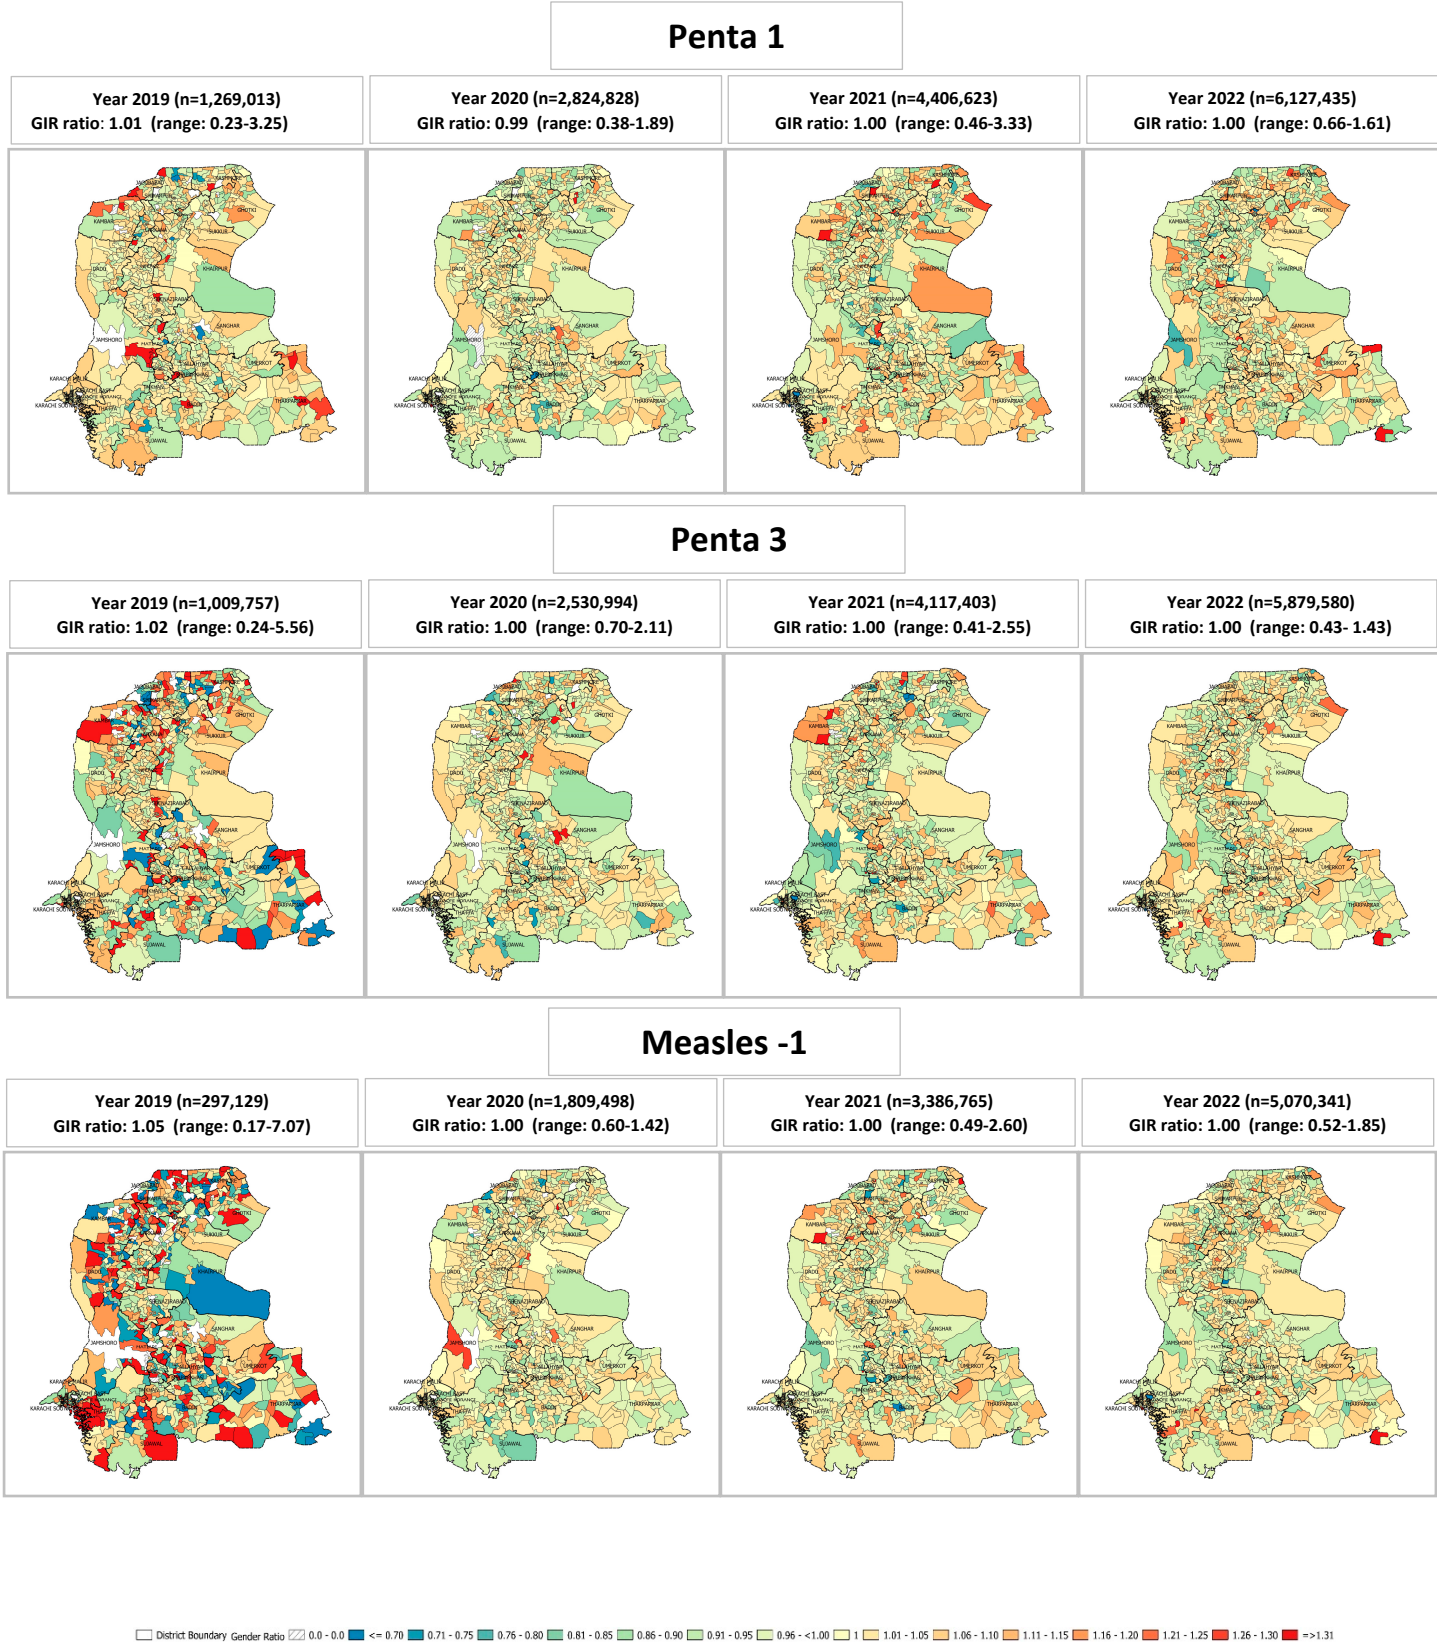



Figure S4: Geographical distribution of UCs showing annual male-to-female ratios of >1.10 among children (>6 weeks) who received Penta-1, Penta-3, and Measles-1 vaccinations in 2019–2022 birth cohorts enrolled in SEIR (1 January 2019–31 December 2022)

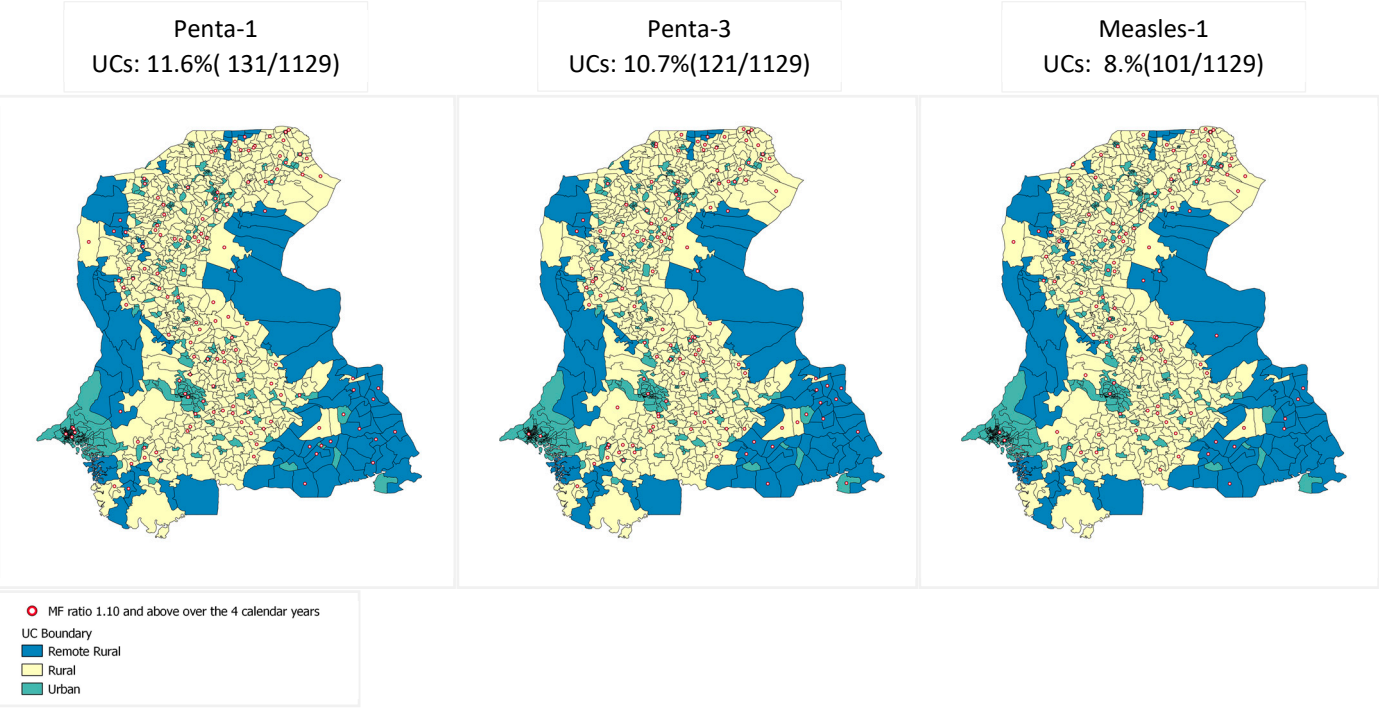



Figure S5: Location of UCs with differing sex ratios of vaccinators in Sindh Province, Pakistan ( $n = 3354$ )

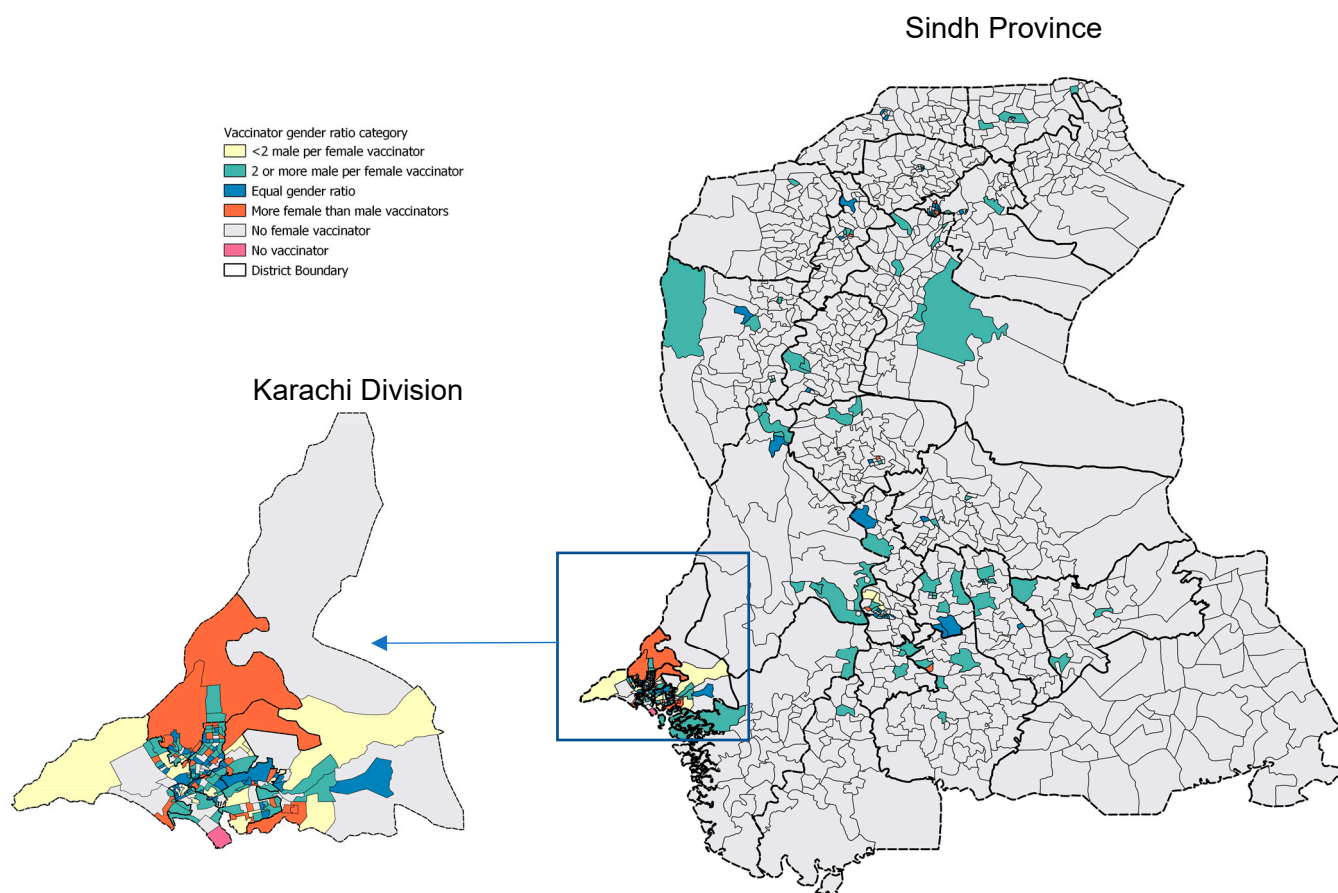

Table S1: Gender inequality ratios of 0–23-month-old children in 2019–2022 birth cohorts in SEIR at enrollment and vaccination coverage in Sindh Province, Pakistan, by district ( $n = 6,235,305$ ) (1 January 2019–31 December 2022);

| Residential district | # of UCs     | Penta valent -1 vaccination | Median (IQR)            | UC range         | Penta valent -3 vaccination | Median (IQR)            | UC range         | Measles-1 vaccination | Median (IQR)            | UC range         |
|----------------------|--------------|-----------------------------|-------------------------|------------------|-----------------------------|-------------------------|------------------|-----------------------|-------------------------|------------------|
| Badin                | 46           | 1.00                        | 1.00 (1.00-1.00)        | 0.99-1.01        | 1.00                        | 1.01 (1.00-1.01)        | 0.96-1.05        | 1.00                  | 1.00 (0.99-1.01)        | 0.97-1.04        |
| Dadu                 | 52           | 1.00                        | 1.00 (1.00-1.00)        | 0.99-1.02        | 1.00                        | 1.00 (1.00-1.01)        | 0.97-1.04        | 1.00                  | 1.00 (1.00-1.01)        | 0.98-1.03        |
| Ghotki               | 40           | 1.00                        | 1.00 (1.00-1.00)        | 0.99-1.02        | 1.00                        | 1.00 (0.99-1.01)        | 0.97-1.03        | 1.00                  | 1.00 (0.99-1.01)        | 0.94-1.03        |
| Hyderabad            | 54           | 1.00                        | 1.00 (0.99-1.01)        | 0.98-1.02        | 0.99                        | 0.99 (0.99-1.00)        | 0.96-1.04        | 1.00                  | 1.00 (0.99-1.01)        | 0.95-1.04        |
| Jacobabad            | 40           | 1.00                        | 1.00 (0.99-1.00)        | 0.97-1.03        | 1.01                        | 1.01 (0.99-1.02)        | 0.92-1.07        | 1.01                  | 1.00 (0.99-1.02)        | 0.95-1.07        |
| Jamshoro             | 28           | 1.00                        | 1.00 (0.99-1.01)        | 0.97-1.02        | 1.00                        | 1.00 (0.99-1.01)        | 0.91-1.02        | 0.99                  | 1.00 (0.98-1.01)        | 0.95-1.03        |
| Kambar               | 40           | 1.00                        | 1.00 (0.99-1.01)        | 0.98-1.02        | 1.00                        | 1.00 (0.98-1.02)        | 0.96-1.05        | 1.00                  | 1.00 (0.98-1.02)        | 0.93-1.05        |
| Karachi Central      | 51           | 1.00                        | 1.00 (1.00-1.00)        | 0.96-1.02        | 1.00                        | 1.00 (0.99-1.01)        | 0.92-1.04        | 1.00                  | 1.00 (0.99-1.01)        | 0.92-1.06        |
| Karachi East         | 28           | 1.00                        | 1.00 (0.99-1.01)        | 0.99-1.02        | 1.00                        | 1.00 (0.99-1.01)        | 0.96-1.05        | 1.00                  | 1.00 (0.99-1.02)        | 0.97-1.06        |
| Karachi South        | 26           | 1.00                        | 1.00 (1.00-1.01)        | 0.98-1.03        | 1.00                        | 1.00 (0.99-1.02)        | 0.96-1.05        | 1.01                  | 1.00 (0.99-1.02)        | 0.96-1.06        |
| Karachi West         | 22           | 1.00                        | 1.00 (1.00-1.01)        | 0.99-1.02        | 1.00                        | 1.00 (0.98-1.01)        | 0.97-1.03        | 1.00                  | 1.00 (0.98-1.01)        | 0.97-1.03        |
| Kashmore             | 37           | 1.00                        | 1.00 (0.99-1.00)        | 0.97-1.05        | 0.99                        | 0.99 (0.97-1.01)        | 0.90-1.06        | 0.99                  | 1.00 (0.98-1.01)        | 0.95-1.02        |
| Kemari               | 21           | 1.00                        | 1.00 (1.00-1.01)        | 0.99-1.04        | 1.00                        | 1.00 (0.99-1.01)        | 0.94-1.03        | 1.00                  | 1.00 (0.99-1.02)        | 0.97-1.05        |
| Khairpur             | 76           | 1.00                        | 1.00 (1.00-1.00)        | 0.98-1.03        | 1.00                        | 1.00 (0.99-1.01)        | 0.95-1.03        | 1.00                  | 1.00 (0.99-1.01)        | 0.97-1.04        |
| Korangi              | 30           | 1.00                        | 1.00 (1.00-1.00)        | 0.95-1.01        | 1.00                        | 1.00 (0.99-1.00)        | 0.57-1.01        | 1.00                  | 0.99 (0.99-1.00)        | 0.96-2.11        |
| Larkana              | 46           | 1.00                        | 1.00 (1.00-1.01)        | 0.99-1.02        | 1.01                        | 1.01 (1.00-1.02)        | 0.97-1.05        | 1.01                  | 1.01 (1.00-1.03)        | 0.96-1.04        |
| Malir                | 19           | 1.00                        | 1.00 (1.00-1.01)        | 0.99-1.02        | 1.01                        | 1.00 (1.00-1.02)        | 0.99-1.04        | 1.01                  | 1.00 (0.99-1.03)        | 0.98-1.15        |
| Matiali              | 18           | 1.00                        | 1.00 (1.00-1.01)        | 0.99-1.02        | 1.00                        | 1.01 (0.99-1.02)        | 0.96-1.08        | 1.00                  | 1.01 (0.99-1.01)        | 0.96-1.09        |
| Mirpurkhas           | 41           | 1.00                        | 1.00 (1.00-1.01)        | 0.98-1.03        | 1.00                        | 1.00 (0.99-1.01)        | 0.95-1.07        | 1.00                  | 1.00 (0.99-1.01)        | 0.97-1.03        |
| Naushero Feroz       | 51           | 1.00                        | 1.00 (1.00-1.01)        | 0.99-1.03        | 1.00                        | 1.00 (0.99-1.01)        | 0.96-1.05        | 1.00                  | 1.00 (0.99-1.01)        | 0.97-1.06        |
| Sanghar              | 55           | 1.00                        | 1.00 (1.00-1.00)        | 0.98-1.02        | 1.00                        | 1.00 (0.99-1.01)        | 0.94-1.02        | 1.00                  | 1.00 (0.99-1.01)        | 0.97-1.02        |
| Shaheed Benazirabad  | 51           | 1.00                        | 1.00 (1.00-1.00)        | 0.98-1.02        | 1.00                        | 1.00 (0.99-1.01)        | 0.98-1.03        | 1.00                  | 1.00 (0.99-1.01)        | 0.98-1.03        |
| Shikarpur            | 49           | 1.00                        | 1.00 (0.99-1.00)        | 0.98-1.02        | 0.99                        | 0.99 (0.98-1.00)        | 0.95-1.04        | 1.00                  | 0.99 (0.98-1.00)        | 0.96-1.04        |
| Sujawal              | 25           | 1.00                        | 1.00 (1.00-1.01)        | 0.99-1.01        | 0.99                        | 0.99 (0.98-1.02)        | 0.96-1.07        | 0.99                  | 1.00 (0.99-1.01)        | 0.96-1.03        |
| Sukkur               | 46           | 1.00                        | 1.00 (0.99-1.01)        | 0.97-1.03        | 0.99                        | 1.00 (0.98-1.01)        | 0.94-1.06        | 1.00                  | 1.00 (0.99-1.02)        | 0.93-1.05        |
| Tando Allahyar       | 20           | 1.00                        | 1.00 (1.00-1.01)        | 0.98-1.01        | 1.00                        | 1.00 (0.98-1.00)        | 0.96-1.03        | 1.00                  | 1.00 (0.99-1.01)        | 0.95-1.03        |
| Tando Muhammad Khan  | 17           | 1.00                        | 1.00 (1.00-1.01)        | 0.99-1.01        | 1.01                        | 1.00 (1.00-1.01)        | 0.98-1.05        | 1.00                  | 1.00 (0.99-1.00)        | 0.98-1.02        |
| Tharparkar           | 44           | 1.00                        | 1.00 (1.00-1.00)        | 0.99-1.02        | 1.00                        | 1.00 (0.99-1.01)        | 0.93-1.02        | 1.00                  | 1.00 (0.99-1.00)        | 0.96-1.02        |
| Thatta               | 30           | 1.00                        | 1.00 (0.99-1.01)        | 0.99-1.04        | 1.00                        | 1.00 (0.99-1.01)        | 0.94-1.08        | 1.00                  | 1.00 (0.99-1.01)        | 0.97-1.02        |
| Umerkot              | 27           | 1.00                        | 1.00 (0.99-1.00)        | 0.98-1.01        | 1.00                        | 1.00 (0.98-1.01)        | 0.97-1.04        | 1.00                  | 0.99 (0.98-1.01)        | 0.97-1.05        |
| <b>Total</b>         | <b>1,130</b> | <b>1.00</b>                 | <b>1.00 (1.00-1.01)</b> | <b>0.95-1.05</b> | <b>1.00</b>                 | <b>1.00 (0.99-1.01)</b> | <b>0.57-1.08</b> | <b>1.00</b>           | <b>1.00 (0.99-1.01)</b> | <b>0.92-2.11</b> |

Table S2: Gender inequality ratios of 0–23-month-old children in 2019–2022 birth cohorts in SEIR at enrollment and by antigens by maternal literacy levels, geographic location , vaccinators sex ratio , and modality of immunization delivery ( $n = 6,235,305$ ) (1 January 2019–31 December 2022)

|                                             | Pentavalent-1 |                  |           | Pentavalent-3 |                  |           | Measles-1 |                  |           |
|---------------------------------------------|---------------|------------------|-----------|---------------|------------------|-----------|-----------|------------------|-----------|
|                                             | GIR           | Median (IQR)     | UC range  | GIR           | Median (IQR)     | UC range  | GIR       | Median (IQR)     | UC range  |
| <b>Maternal literacy level</b>              |               |                  |           |               |                  |           |           |                  |           |
| Illiterate                                  | 1.0<br>0      | 1.00 (1.00-1.00) | 0.00-2.00 | 1.0<br>0      | 1.00 (0.98-1.02) | 0.00-3.12 | GIR       | 1.00 (0.98-1.01) | 0.00-3.20 |
| 1-5                                         | 1.0<br>0      | 1.00 (1.00-1.00) | 0.00-2.00 | 1.0<br>0      | 1.00 (0.97-1.03) | 0.00-2.50 | 1.0<br>0  | 1.00 (0.97-1.03) | 0.00-3.00 |
| 6-8                                         | 1.0<br>0      | 1.00 (1.00-1.01) | 0.00-3.57 | 1.0<br>0      | 1.00 (0.93-1.01) | 0.00-3.18 | 1.0<br>0  | 1.00 (0.95-1.05) | 0.00-3.75 |
| 9-10                                        | 1.0<br>0      | 1.00 (1.00-1.00) | 0.00-2.00 | 1.0<br>1      | 1.00 (0.96-1.06) | 0.00-2.63 | 1.0<br>1  | 1.00 (0.94-1.06) | 0.00-4.00 |
| >=11                                        | 1.0<br>0      | 1.00 (1.00-1.00) | 0.00-1.50 | 1.0<br>0      | 1.00 (0.93-1.04) | 0.00-3.00 | 1.0<br>0  | 1.00 (0.93-1.04) | 0.00-3.20 |
|                                             |               |                  |           |               |                  |           |           |                  |           |
| <b>Geographic profile</b>                   |               |                  |           |               |                  |           |           |                  |           |
| Rural                                       | 1.0<br>0      | 1.00 (1.00-1.00) | 0.97-1.05 | 1.0<br>0      | 1.00 (0.99-1.01) | 0.90-1.08 | 1.0<br>0  | 1.00 (0.99-1.01) | 0.93-1.09 |
| Urban                                       | 1.0<br>0      | 1.00 (1.00-1.01) | 0.95-1.04 | 1.0<br>0      | 1.00 (0.99-1.01) | 0.57-1.08 | 1.0<br>0  | 1.00 (0.99-1.01) | 0.92-2.11 |
|                                             |               |                  |           |               |                  |           |           |                  |           |
| Remote rural                                | 1.0<br>0      | 1.00 (1.00-1.00) | 0.97-1.03 | 1.0<br>0      | 1.00 (0.99-1.02) | 0.93-1.06 | 1.0<br>0  | 1.00 (0.99-1.00) | 0.95-1.04 |
| Rural                                       | 1.0<br>0      | 1.00 (1.00-1.01) | 0.97-1.05 | 1.0<br>0      | 1.00 (0.99-1.01) | 0.90-1.08 | 1.0<br>0  | 1.00 (0.99-1.01) | 0.93-1.09 |
|                                             |               |                  |           |               |                  |           |           |                  |           |
| Slum                                        | 1.0<br>0      | 1.00 (1.00-1.01) | 0.95-1.04 | 1.0<br>0      | 1.00 (0.99-1.01) | 0.57-1.08 | 1.0<br>0  | 1.00 (0.99-1.01) | 0.92-2.11 |
| Non-slum                                    | 1.0<br>0      | 1.00 (1.00-1.01) | 0.98-1.04 | 1.0<br>0      | 1.00 (0.99-1.01) | 0.94-1.04 | 1.0<br>0  | 1.00 (0.99-1.01) | 0.96-1.04 |
|                                             |               |                  |           |               |                  |           |           |                  |           |
| <b>Vaccination modality</b>                 |               |                  |           |               |                  |           |           |                  |           |
| Fixed                                       | 1.0<br>0      | 1.01 (0.97-1.05) | 0.36-4.14 | 1.0<br>0      | 1.01 (0.96-1.06) | 0.46-2.40 | 1.0<br>0  | 1.01 (0.95-1.07) | 0.13-4.77 |
| Outreach                                    | 1.0<br>0      | 1.00 (0.96-1.03) | 0.55-1.83 | 1.0<br>1      | 1.00 (0.97-1.03) | 0.76-1.59 | 1.0<br>0  | 1.00 (0.96-1.03) | 0.53-2.03 |
| EOA                                         | 0.9<br>9      | 0.99 (0.93-1.04) | 0.24-4.37 | 0.9<br>9      | 0.99 (0.93-1.05) | 0.21-6.09 | 1.0<br>0  | 0.99 (0.93-1.04) | 0.14-5.29 |
|                                             |               |                  |           |               |                  |           |           |                  |           |
| <b>Vaccinators' gender ratio categories</b> |               |                  |           |               |                  |           |           |                  |           |
| No female vaccinator                        | 1.0<br>0      | 1.00 (1.00-1.00) | 0.97-1.05 | 1.0<br>0      | 1.00 (0.99-1.01) | 0.90-1.08 | 1.0<br>0  | 1.00 (0.99-1.01) | 0.93-1.15 |
| M:F ratio >=2                               | 1.0<br>0      | 1.00 (1.00-1.01) | 0.98-1.03 | 1.0<br>0      | 1.00 (0.99-1.01) | 0.96-1.07 | 1.0<br>0  | 1.00 (0.99-1.01) | 0.96-1.06 |
| 1<M:F ratio<2                               | 1.0<br>0      | 1.00 (1.00-1.01) | 0.98-1.02 | 1.0<br>0      | 0.99 (0.99-1.00) | 0.97-1.03 | 1.0<br>0  | 1.00 (0.99-1.00) | 0.98-1.05 |
| M:F ratio<1                                 | 1.0<br>0      | 1.00 (1.00-1.01) | 0.99-1.02 | 1.0<br>0      | 1.00 (0.99-1.01) | 0.98-1.05 | 1.0<br>0  | 1.00 (0.99-1.01) | 0.97-1.06 |
| M:F ratio=1                                 | 1.0<br>0      | 1.00 (0.99-1.00) | 0.96-1.03 | 1.0<br>0      | 1.00 (0.98-1.01) | 0.92-1.07 | 1.0<br>0  | 1.00 (0.99-1.01) | 0.92-1.07 |
| No vaccinator                               | 1.0<br>3      | 1.03 (1.03-1.03) | 1.03-1.03 | 0.9<br>9      | 0.99 (0.57-1.01) | 0.57-1.01 | 1.0<br>0  | 1.06 (1.00-2.11) | 1.00-2.11 |



Table S3: Number of UCs showing persistent gender inequities in vaccination (M:F > 1.05) from 2019–2022 ( $n = 1129$ )

| M:F ratio | Penta 1  |     |      | Penta 3  |     |      | Measles -1 |     |      |
|-----------|----------|-----|------|----------|-----|------|------------|-----|------|
|           | # of UCs | n   | %    | # of UCs | n   | %    | # of UCs   | n   | %    |
| ≥1.05     | 1,129    | 280 | 24.8 | 1,129    | 268 | 23.7 | 1,129      | 218 | 19.3 |
| ≥1.10     | 1,129    | 131 | 11.6 | 1,129    | 121 | 10.7 | 1,129      | 101 | 8.9  |
| ≥1.15     | 1,129    | 51  | 4.5  | 1,129    | 56  | 5.0  | 1,129      | 42  | 3.7  |
| ≥1.20     | 1,129    | 24  | 2.1  | 1,129    | 18  | 1.6  | 1,129      | 20  | 1.8  |
| ≥1.25     | 1,129    | 25  | 2.2  | 1,129    | 10  | 0.9  | 1,129      | 9   | 0.8  |
| ≥1.30     | 1,129    | 8   | 0.7  | 1,129    | 4   | 0.4  | 1,129      | 6   | 0.5  |
| ≥1.35     | 1,129    | 6   | 0.5  | 1,129    | 3   | 0.3  | 1,129      | 2   | 0.2  |
| ≥1.40     | 1,129    | 2   | 0.2  | 1,129    | 3   | 0.3  | 1,129      | 2   | 0.2  |
| ≥1.45     | 1,129    | 2   | 0.2  | 1,129    | 1   | 0.1  | 1,129      | 2   | 0.2  |
| ≥1.50     | 1,129    | 2   | 0.2  | 1,129    | 1   | 0.1  | 1,129      | 2   | 0.2  |
| ≥1.55     | 1,129    | 1   | 0.1  | 1,129    | 1   | 0.1  | 1,129      | 1   | 0.1  |
| ≥1.60     | 1,129    | 1   | 0.1  | 1,129    | 1   | 0.1  | 1,129      | 1   | 0.1  |
| ≥2.0      | 1,129    | -   | -    | 1,129    | -   | -    | 1,129      | 1   | 0.1  |

Table S4: Categorization of remote-rural, rural, and urban UCs by sex ratio of vaccinators ( $n = 1130$ )

| Vaccinator' gender ratio categories | Category     |       |       |       |
|-------------------------------------|--------------|-------|-------|-------|
|                                     | Remote Rural | Rural | Urban | Total |
| No female vaccinator                | 87           | 548   | 217   | 852   |
| M:F ratio ≥2                        | 0            | 26    | 108   | 134   |
| 1<M:F ratio<2                       | 0            | 0     | 23    | 23    |
| M:F ratio<1                         | 0            | 0     | 39    | 39    |
| M:F ratio=1                         | 0            | 5     | 77    | 82    |
| Total                               | 87           | 579   | 464   | 1130  |
